# Supplementary material for: Mechanochromic polymer blends made with an excimer-forming telechelic sensor molecule
Source: Royal Society of Chemistry journal article supplement (doi:10.1039/d3sm01489d), 2024-01-01
Supplement: d3sm01489d1.pdf [file d3sm01489d1.pdf]

## Supporting Information for

### **Mechanochromic polymer blends made with an excimer-forming telechelic sensor molecule**

Marta Oggioni,<sup>a</sup> Jess M. Clough<sup>a,b</sup> and Christoph Weder<sup>\*a,b</sup>

<sup>a</sup>*Adolphe Merkle Institute, University of Fribourg, Chemin des Verdiers 4, CH-1700 Fribourg, Switzerland.*

<sup>b</sup>*National Center of Competence in Research Bio-inspired Materials, Chemin des Verdiers 4, CH-1700 Fribourg, Switzerland.*

## 1. Supporting Data

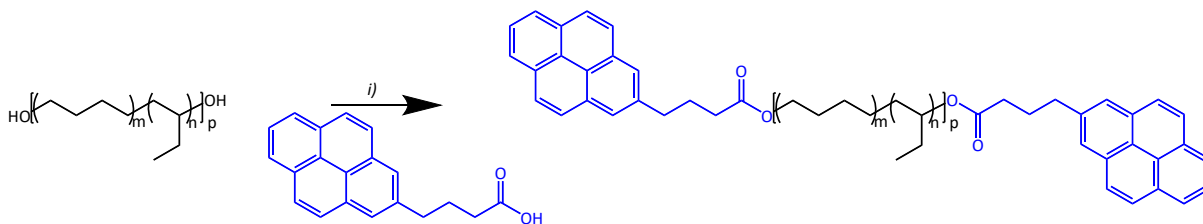

**Figure S1.** Scheme of the synthesis of the excimer-forming, pyrene-terminated poly(ethylene-co-butylene) (**Py-PEB**). **Py-PEB** was prepared from 1-pyrenebutyric acid and dihydroxy-terminated poly(ethylene-co-butylene) (OH-PEB) ( $M_n = 3100 \text{ g mol}^{-1}$ ). *Reagents and conditions:* *i)* DCC, DMAP,  $\text{CH}_2\text{Cl}_2$ , rt,  $\text{N}_2$ , 28 h, 32%.

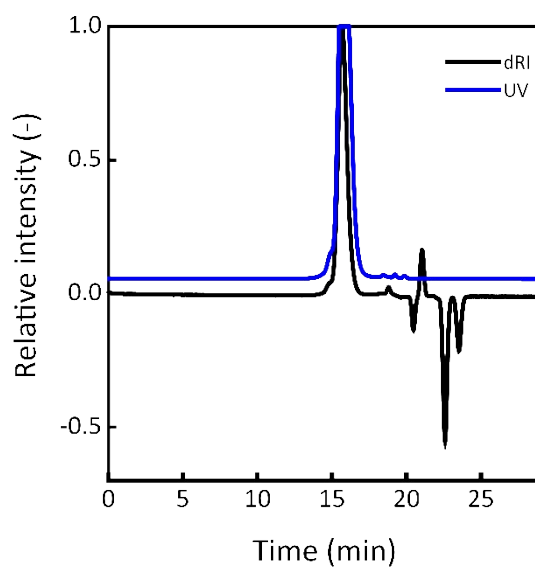

**Figure S2.** Size-exclusion chromatography (SEC) traces of **Py-PEB** detected by refractive index (dRI) and UV-Vis absorption detectors. Since the PEB backbone does not absorb light in the UV-vis regime, the overlap of the two traces shows that the pyrene moieties are covalently attached to the telechelic PEB core.

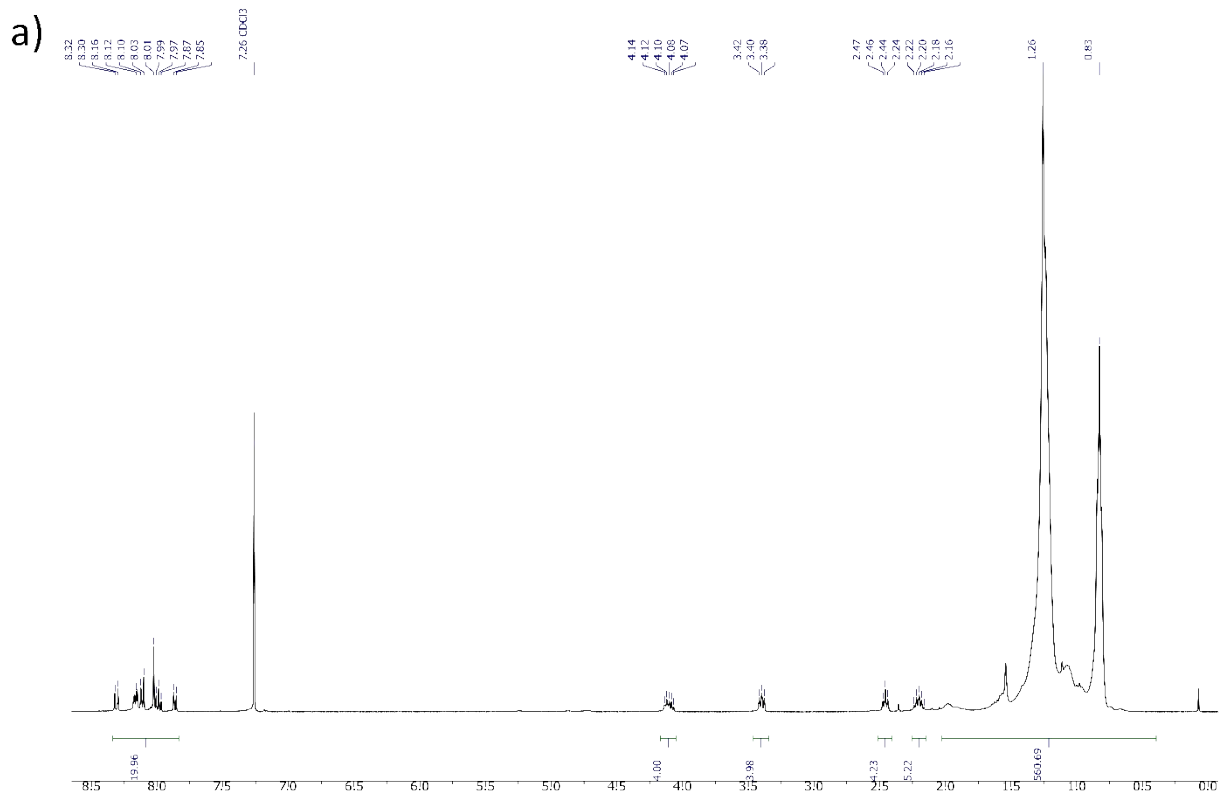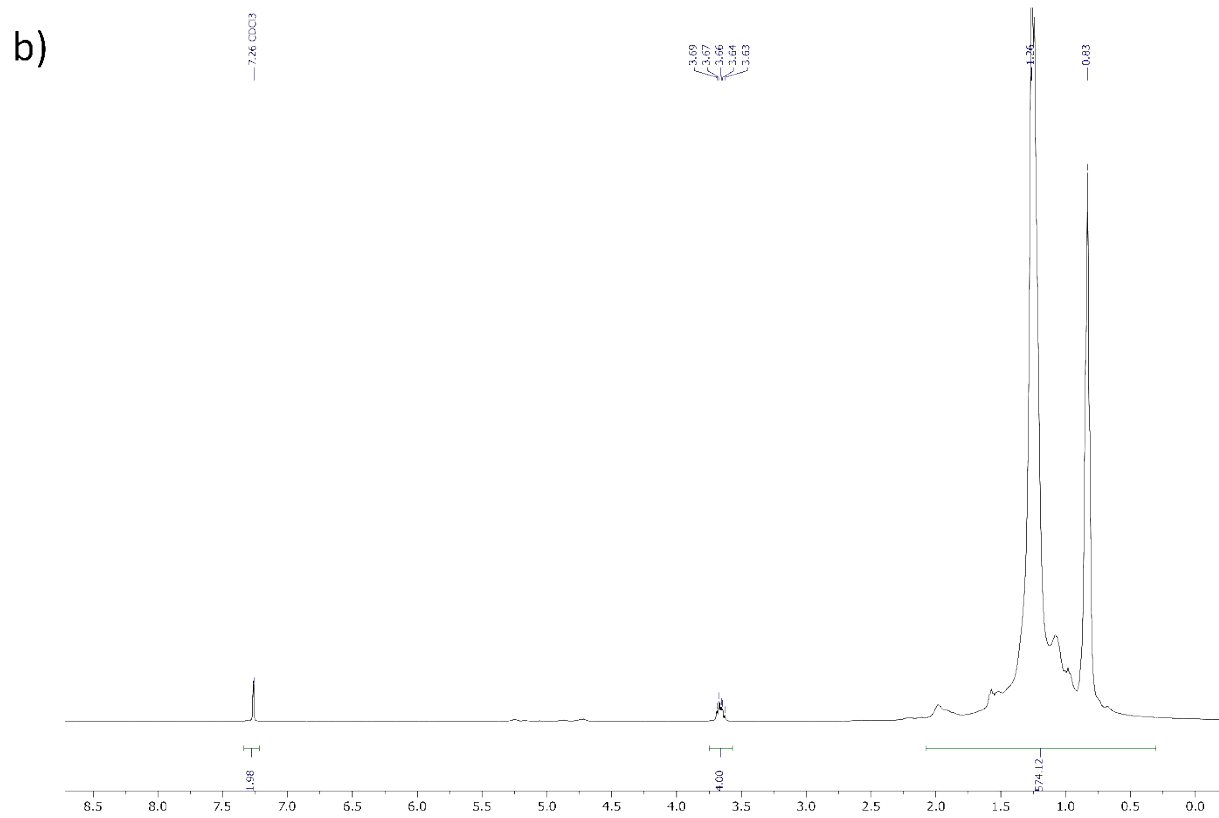

Figure S3a,b. a) <sup>1</sup>H-NMR spectrum of Py-PEB; b) <sup>1</sup>H-NMR spectrum of OH-PEB recorded in CDCl<sub>3</sub>.

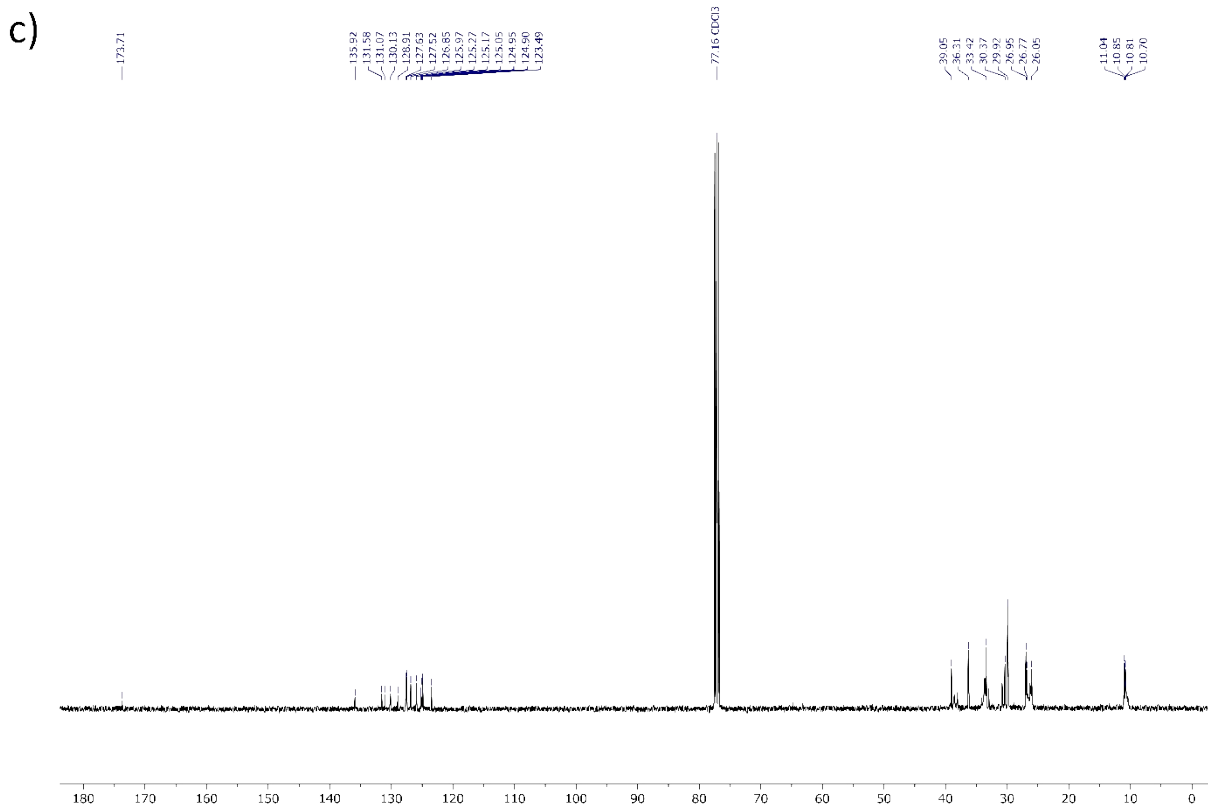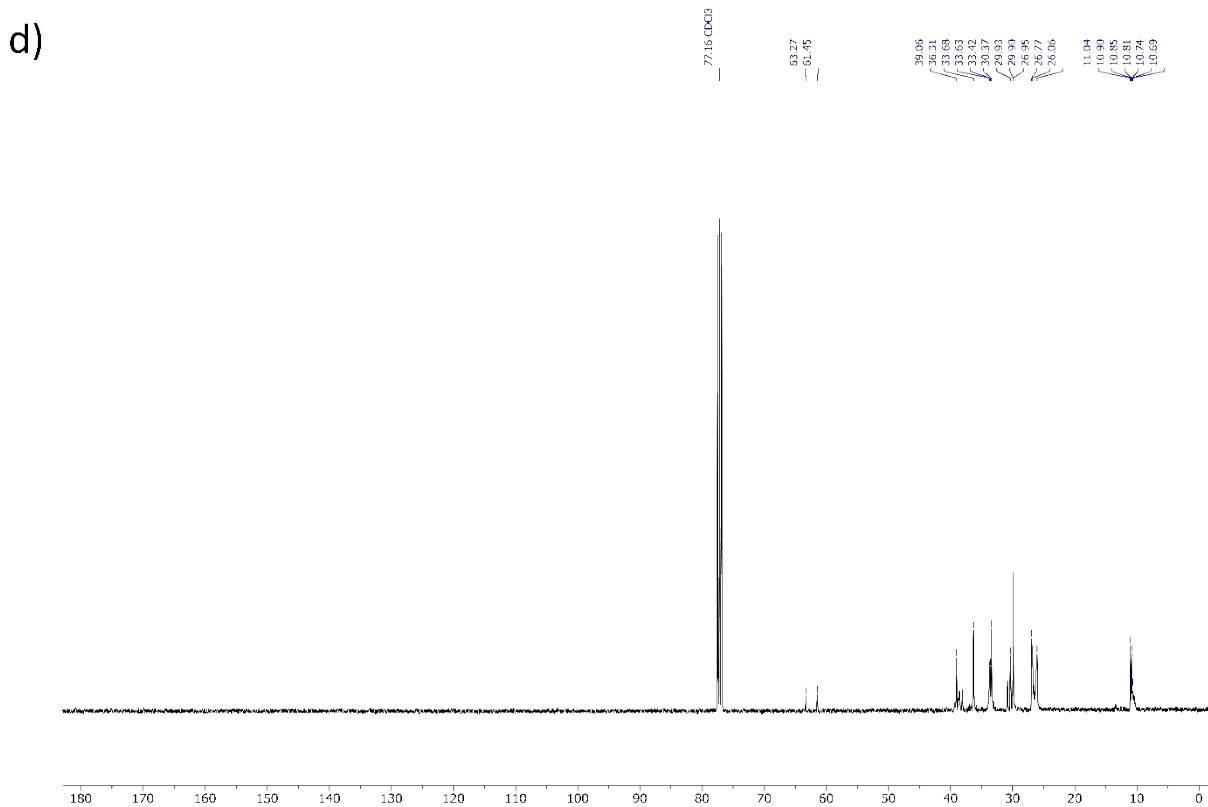

Figure S3c,d. c)  $^{13}\text{C}$ -NMR spectrum of Py-PEB; d)  $^{13}\text{C}$ -NMR spectrum of OH-PEB recorded in  $\text{CDCl}_3$ .

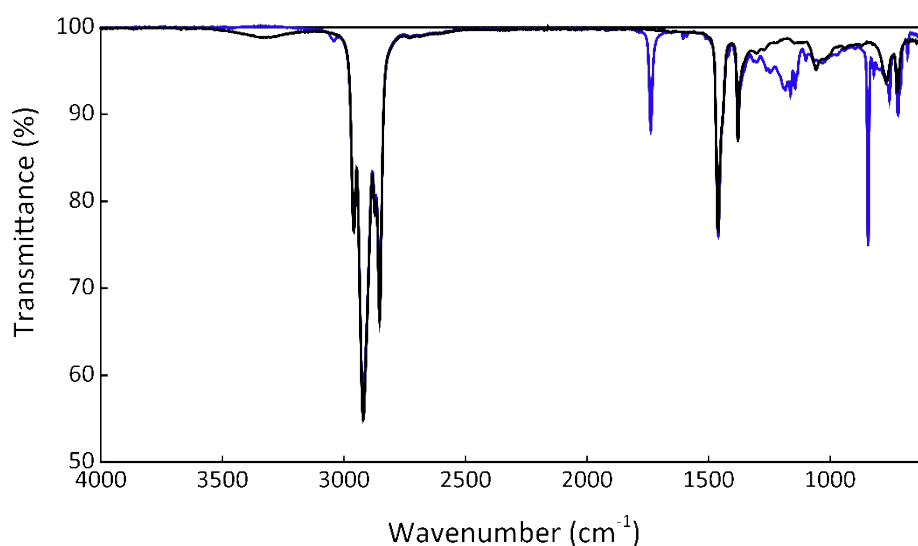

**Figure S4.** FTIR spectra of **Py-PEB** (blue) and **OH-PEB** (black).

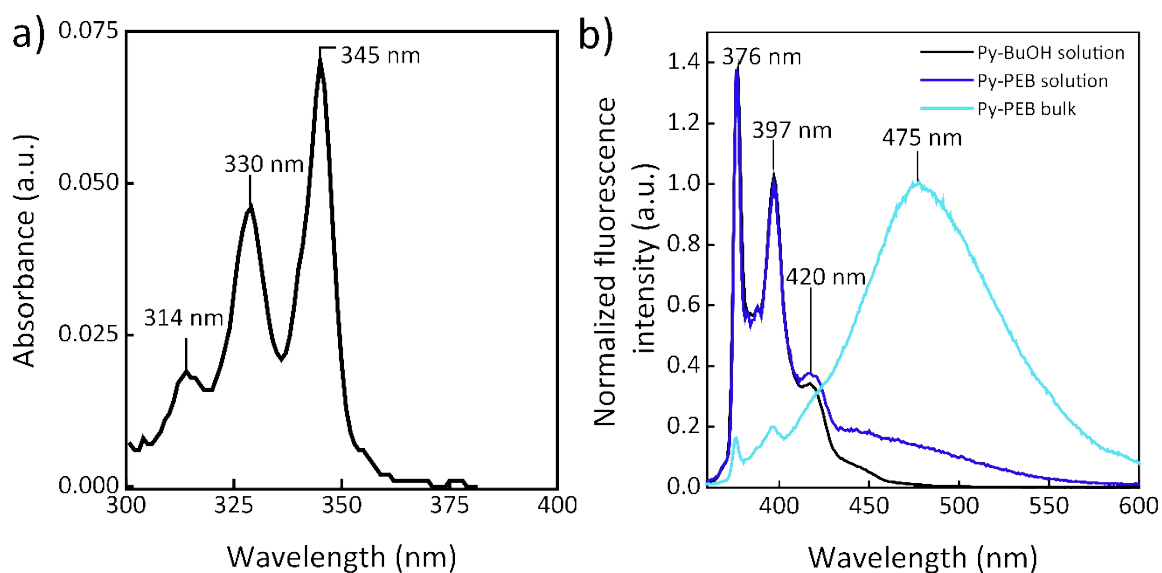

**Figure S5.** a) UV-Vis absorption spectrum of **Py-PEB** in toluene ( $c = 1 \mu\text{mol L}^{-1}$ ). b) Photoluminescence spectra of a toluene solution of the low-molecular weight model compound 1-pyrenebutanol ( $c = 2 \mu\text{mol L}^{-1}$ , black), a **Py-PEB** solution in toluene ( $c = 1 \mu\text{mol L}^{-1}$ , blue), and **Py-PEB** in the liquid bulk state (cyan). The excitation wavelength was, in all cases, 310 nm. The emission spectra show exclusively monomer (1-pyrenebutanol solution), predominantly monomer (**Py-PEB** solution), and predominantly excimer (bulk **Py-PEB**) emission.

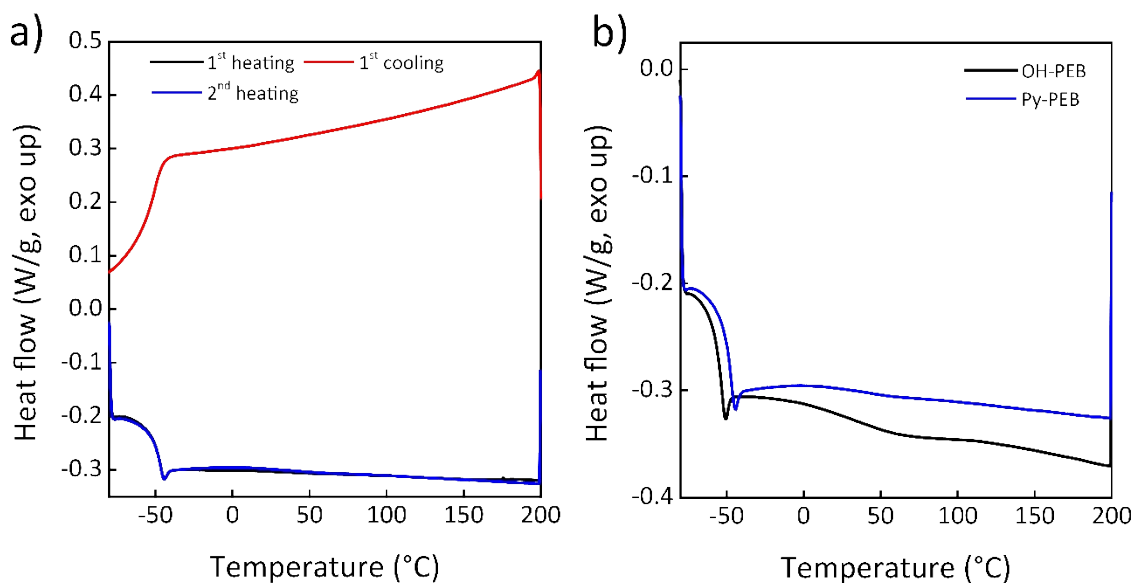

**Figure S6.** a) Differential scanning calorimetry (DSC) traces (first and second heating and first cooling scans) of **Py-PEB**. The material is completely amorphous, with a  $T_g$  at ca.  $-44^\circ\text{C}$ . b) DSC traces (second heating) of the parent OH-PEB (black) and **Py-PEB** (blue). The curves show that the  $T_g$  of **Py-PEB** (ca.  $-44^\circ\text{C}$ ) is slightly higher than the  $T_g$  of OH-PEB (ca.  $-50^\circ\text{C}$ ). All DSC traces were acquired at heating and cooling rates of  $10^\circ\text{C min}^{-1}$ .

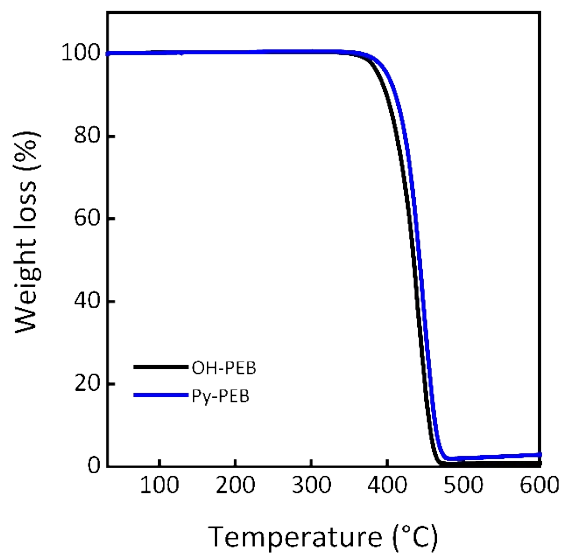

**Figure S7.** Thermogravimetric analysis (TGA) traces of **Py-PEB** (blue) and the parent OH-PEB (black). The pyrene-functionalized telechelic shows a slightly higher onset temperature of thermal degradation ( $326^\circ\text{C}$ ) than the parent OH-PEB ( $318^\circ\text{C}$ ). The traces were acquired at a heating rate of  $10^\circ\text{C min}^{-1}$ .

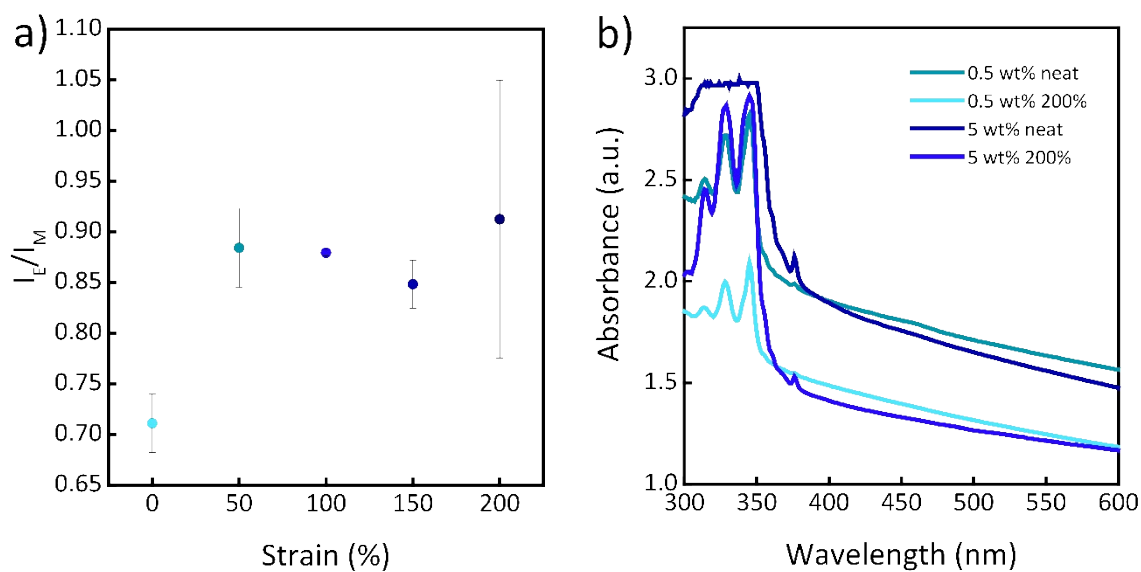

**Figure S8.** a) Plot of the excimer-to monomer intensity ratio  $I_E/I_M$  of PI/Py-PEB<sub>5</sub> film samples, stretched to 200% strain at a strain rate of 50% min<sup>-1</sup>. The excitation wavelength was 310 nm. b) UV-Vis absorbance spectra of PI/Py-PEB<sub>0.5</sub> and PI/Py-PEB<sub>5</sub> film samples. A higher level of light scattering around 397 nm ( $I_M$ ) could explain why the neat samples show lower  $I_E$  than the stretched samples.

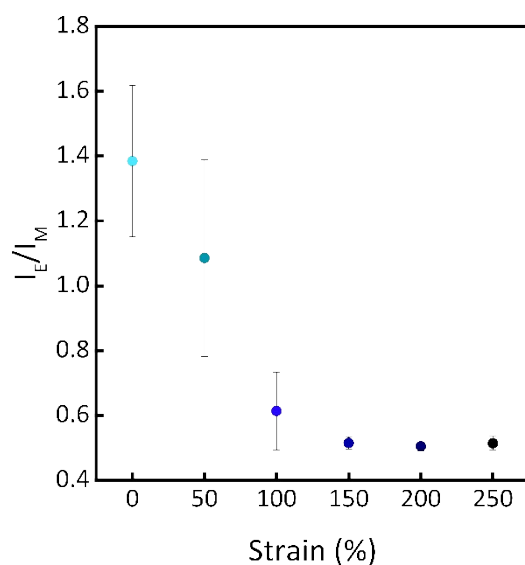

**Figure S9.** Plot of the excimer-to-monomer intensity ratio  $I_E/I_M$  of PCL/Py-PEB<sub>1</sub> film samples, stretched to 250% strain at a strain rate of 50% min<sup>-1</sup>. The excitation wavelength was 310 nm.

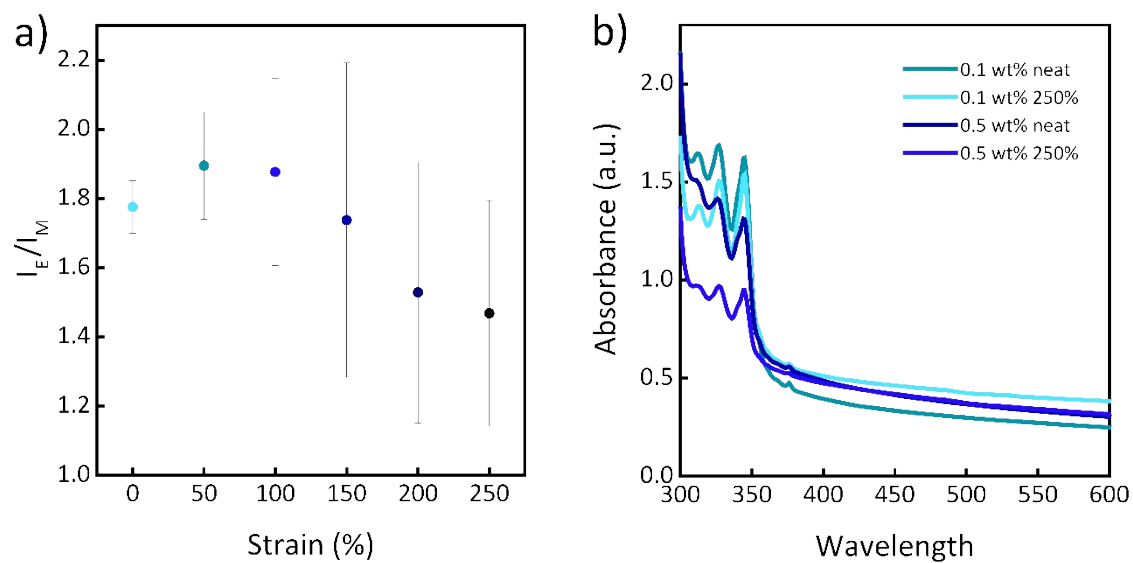

**Figure S10.** a) Plot of the excimer-to monomer intensity ratio  $I_E/I_M$  of PU/Py-PEB<sub>0.2</sub> film samples, stretched to 250% strain at a strain rate of 50% min<sup>-1</sup>. The excitation wavelength was 310 nm. b) UV-Vis absorbance spectra of PU/Py-PEB<sub>0.1</sub> and PU/Py-PEB<sub>0.5</sub> film samples. Scattering of light at 397 nm here does not vary greatly between neat and stretched samples. The origin of the increase in  $I_E$  between 0 and 50% strain is still unclear for these samples.



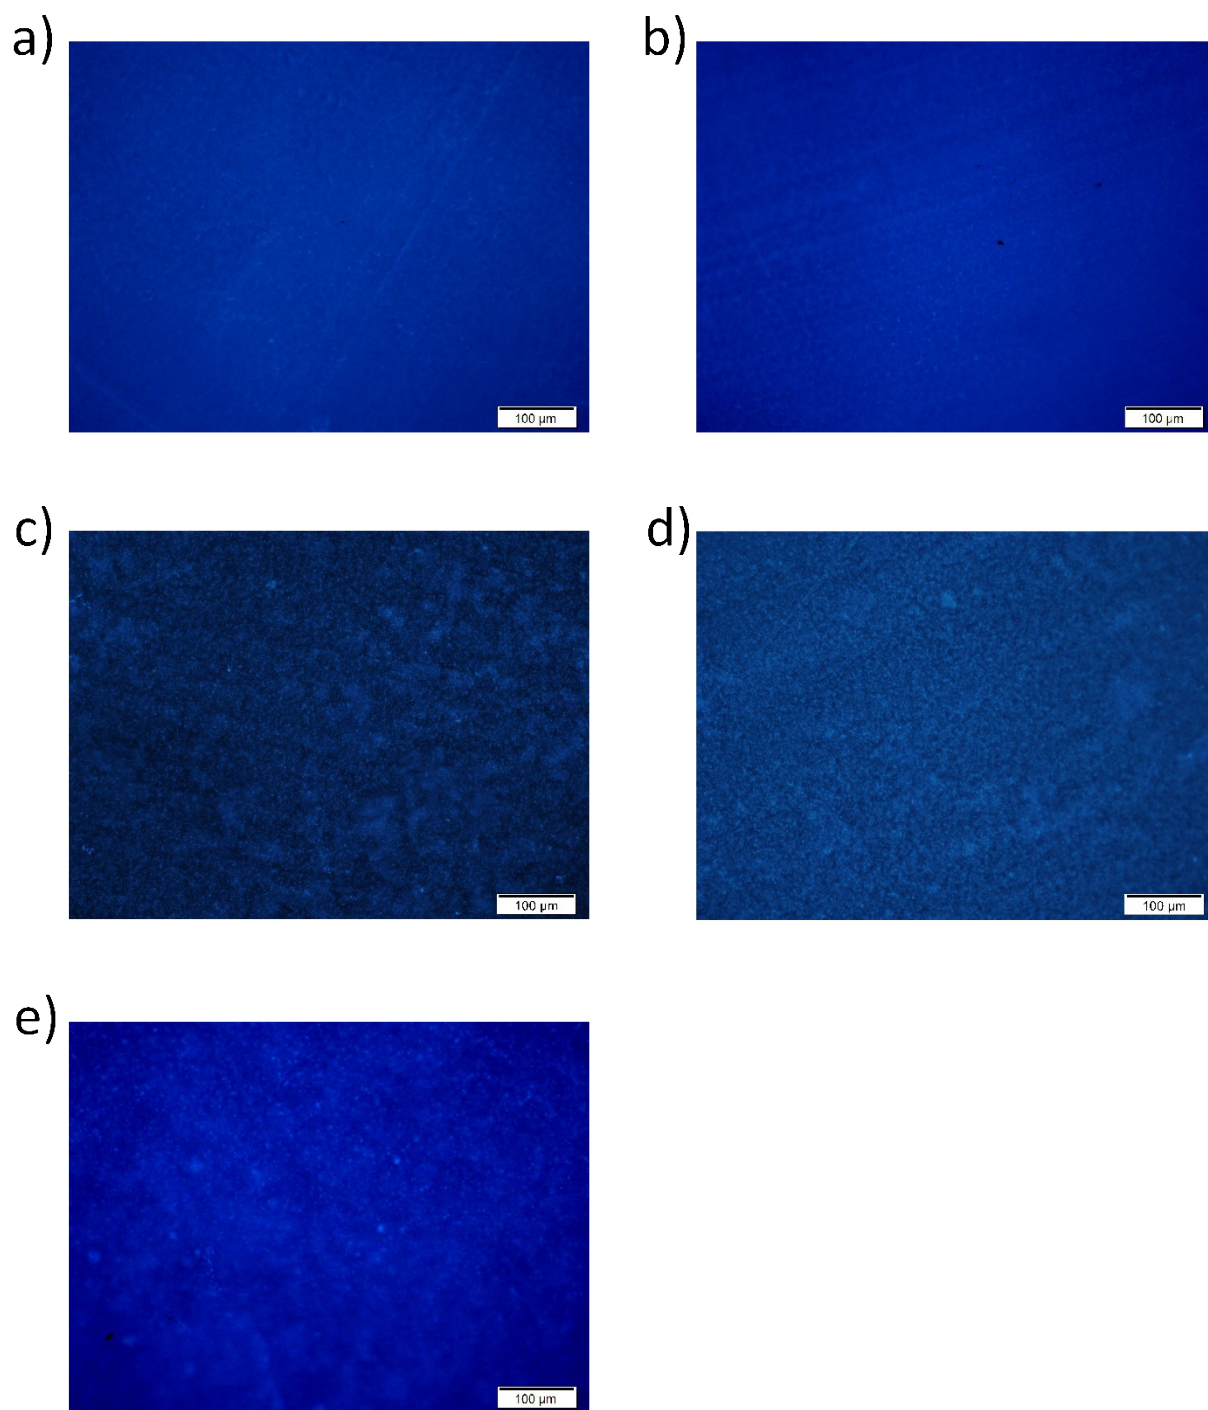

**Figure S11.** Fluorescence microscopy images of films of the following blends: a) PI/Py-PEB<sub>5</sub>; b) PI/Py-PEB<sub>10</sub>; c) PU/Py-PEB<sub>0.2</sub>; d) PU/Py-PEB<sub>1</sub>; e) PCL/Py-PEB<sub>1</sub>. Droplet formation is clearly visible in c) d) and e), but less so in a) and b). Images were recorded with a wideband UV filter ( $\lambda_{\text{ex}} = 330\text{-}385\text{ nm}$ ;  $\lambda_{\text{em}} = 420\text{-}900\text{ nm}$ , Olympus U-MWU2).

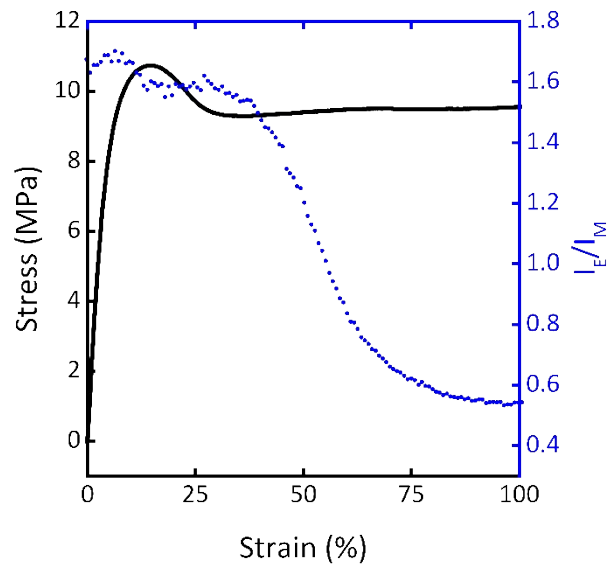

**Figure S12.** Magnification of the low-strain regime (0-100%) of the data shown in **Figure 3c**.

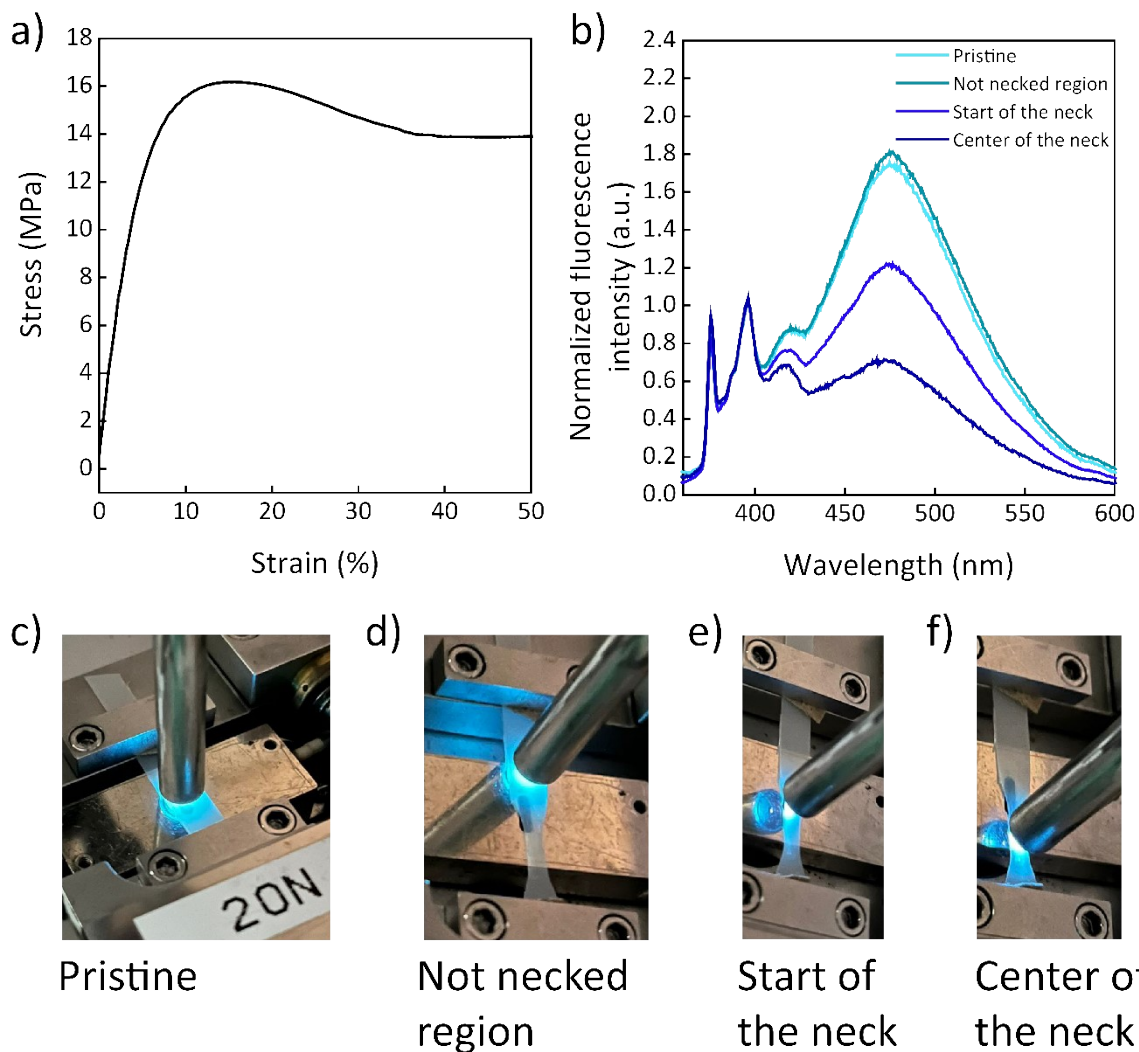

**Figure S13.** Possible scenarios of in-situ photoluminescence measurements during the stress-strain test of a polymer film that shows necking. a) Stress-strain curve of a PCL/Py-PEB<sub>1</sub> film. b) Fluorescence spectra of the pristine film and of the deformed film (50% strain) recorded in different locations of the sample. The four different spectra were acquired in the regions shown in pictures c)-f).

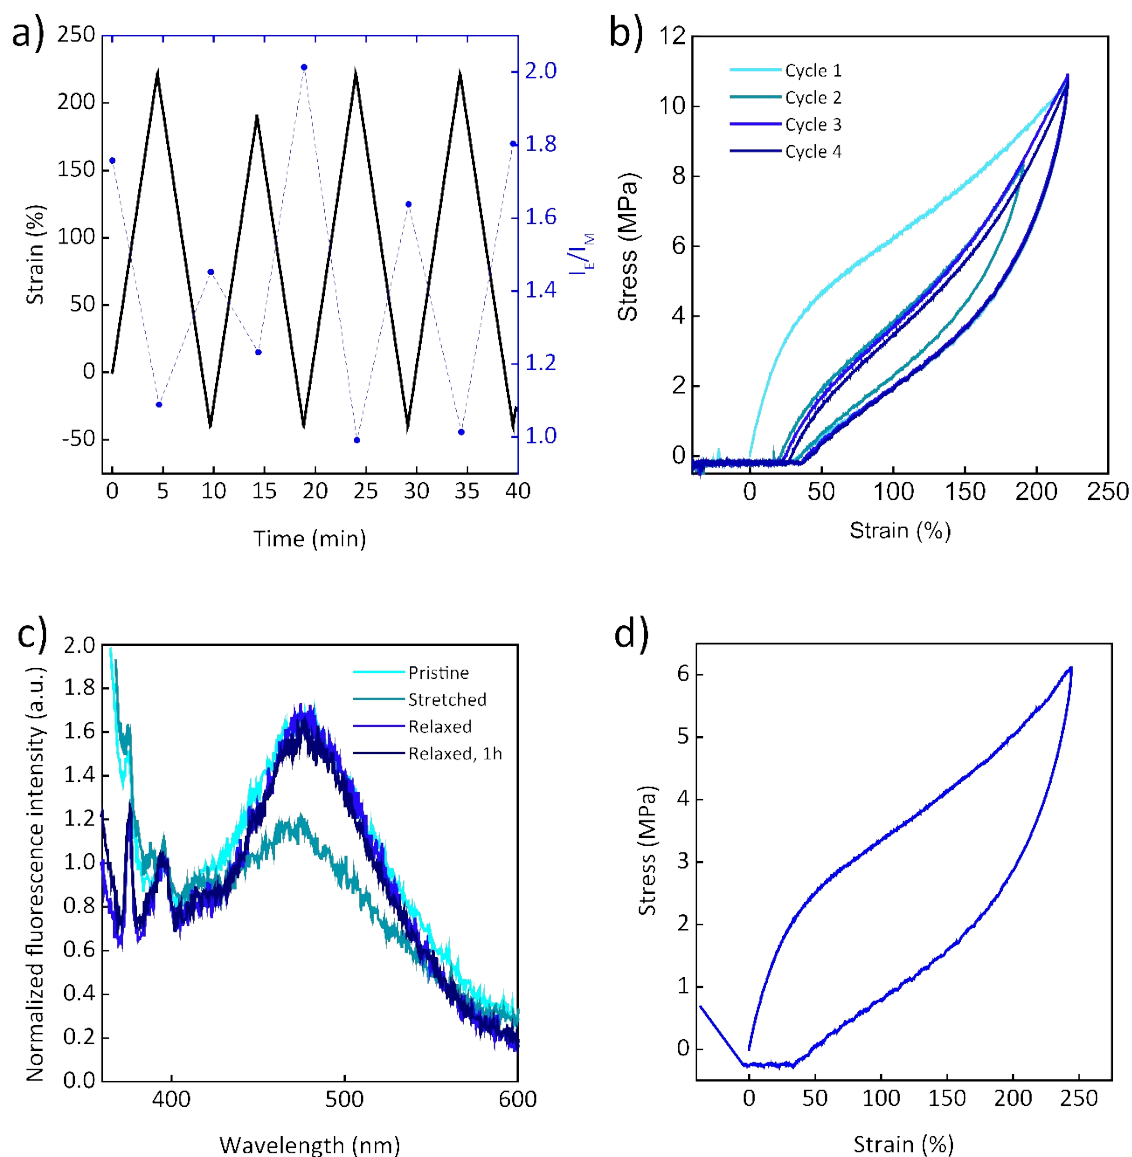

**Figure S14.** a) Cyclic deformation experiment of a PU/Py-PEB<sub>0.2</sub> film. The sample was stretched and relaxed at a strain rate of ca. 50% min<sup>-1</sup>. Fluorescence spectra were recorded of the stretched and relaxed sample for each cycle. b) Stress-strain curves acquired during the cyclic deformation experiment shown in a). c) Photoluminescence spectra of a PU/Py-PEB<sub>0.2</sub> film that was stretched once, relaxed, and measured again 1 h after relaxation. d) Stress-strain curve relative to the stretching of the sample in c).
